# Supplementary material for: Development and validation of a prediction rule for estimating gastric cancer risk in the Chinese high-risk population: a nationwide multicentre study
Source: PubMed Central journal article supplement — Gut. 2019 Mar 29;68(9):1576–87. doi: 10.1136/gutjnl-2018-317556 (PMC6709770; doi:10.1136/gutjnl-2018-317556), 2019-03-29
Supplement: gutjnl-2018-317556supp001.pdf [file gutjnl-2018-317556supp001.pdf]

**Supplementary Table 1** Univariate and multivariable analyses in the validation cohort

| Variable                        | Validation cohort        |                           |                                | P Value |
|---------------------------------|--------------------------|---------------------------|--------------------------------|---------|
|                                 | Total cohort<br>(n=5091) | Gastric cancer<br>(n=138) | Non-gastric cancer<br>(n=4953) |         |
|                                 | No.                      | No. (%)                   | No. (%)                        |         |
| Age, years                      |                          |                           |                                | <0.001  |
| 40-49                           | 1454                     | 19 (13.8)                 | 1435 (29)                      |         |
| 50-59                           | 1703                     | 35 (25.4)                 | 1668 (33.7)                    |         |
| 60-69                           | 1405                     | 51 (37)                   | 1354 (27.3)                    |         |
| > 69                            | 529                      | 33 (23.9)                 | 496 (10)                       |         |
| Mean (SD)                       | 56.3 (9.7)               | 62.1 (9.7)                | 56.1 (9.6)                     | < 0.001 |
| Body mass index‡                |                          |                           |                                |         |
| Mean (SD)                       | 22.86 (2.88)             | 22.13 (3.03)              | 22.88 (2.87)                   | 0.092   |
| PG I, ng/ml                     |                          |                           |                                | <0.001  |
| ≤ 41.92                         | 312                      | 26 (18.8)                 | 286 (5.8)                      |         |
| 41.93-277.00                    | 4474                     | 100 (72.5)                | 4374 (88.3)                    |         |
| > 277.00                        | 305                      | 12 (8.7)                  | 293 (5.9)                      |         |
| Median (range)                  | 108.78 (921.58)          | 128.26 (531.68)           | 108.78 (921.58)                | 0.001   |
| PG II, ng/ml                    |                          |                           |                                | <0.001  |
| ≤ 2.78                          | 265                      | 6 (4.3)                   | 259 (5.2)                      |         |
| 2.79-37.23                      | 4539                     | 122 (88.4)                | 4417 (89.2)                    |         |
| > 37.23                         | 287                      | 10 (7.2)                  | 277 (5.6)                      |         |
| Median (range)                  | 9.05 (263.10)            | 12.25 (93.88)             | 9 (263.10)                     | <0.001  |
| PG I/II ratio                   |                          |                           |                                | <0.001  |
| ≥ 3.89                          | 4795                     | 117 (84.8)                | 4678 (94.4)                    |         |
| < 3.89                          | 296                      | 21 (15.2)                 | 275 (5.6)                      |         |
| Median (range)                  | 11.84 (818.65)           | 8.71 (174.82)             | 11.95(818.65)                  | <0.001  |
| G-17, pmol/l                    |                          |                           |                                |         |
| ≤ 1.49                          | 1411                     | 17 (12.3)                 | 1394 (28.1)                    |         |
| 1.50-5.70                       | 1764                     | 47 (34.1)                 | 1717 (34.7)                    |         |
| > 5.70                          | 1916                     | 74 (53.6)                 | 1842 (37.2)                    |         |
| Median (range)                  | 3.44 (356.9)             | 6.38 (173.25)             | 3.40 (356.90)                  | <0.001  |
| Sex                             |                          |                           |                                | <0.001  |
| Female                          | 2557                     | 39 (28.3)                 | 2518 (50.8)                    |         |
| Male                            | 2534                     | 99 (71.7)                 | 2435 (49.2)                    |         |
| Anti- <i>H. pylori</i> IgG, EIU |                          |                           |                                | 0.643   |
| Negative (< 34)                 | 2853                     | 80 (58)                   | 2773 (56)                      |         |
| Positive (≥ 34)                 | 2238                     | 58 (42)                   | 2180 (44)                      |         |
| Family history                  |                          |                           |                                | 0.923   |
| No                              | 4413                     | 120 (87)                  | 4293 (86.7)                    |         |
| Yes                             | 678                      | 18 (13)                   | 660 (13.3)                     |         |
| Smoking                         |                          |                           |                                | 0.031   |
| No                              | 3995                     | 98 (71)                   | 3897 (78.7)                    |         |
| Yes                             | 1096                     | 40 (29)                   | 1056 (21.3)                    |         |
| Alcohol drinking                |                          |                           |                                | <0.001  |

|                     |      |            |             |       |
|---------------------|------|------------|-------------|-------|
| No                  | 4247 | 100 (72.5) | 4147 (83.7) |       |
| Yes                 | 844  | 38 (27.5)  | 806 (16.3)  |       |
| High-salt diet      |      |            |             | 0.044 |
| No                  | 3078 | 72 (52.2)  | 3006 (60.7) |       |
| Yes                 | 2013 | 66 (47.8)  | 1947 (39.3) |       |
| Pickled food        |      |            |             | 0.004 |
| Occasional          | 4132 | 99 (71.7)  | 4033 (81.4) |       |
| Regular             | 959  | 39 (28.3)  | 920 (18.6)  |       |
| Fried food          |      |            |             | 0.217 |
| Occasional          | 4713 | 124 (89.9) | 4589 (92.7) |       |
| Regular             | 378  | 14 (10.1)  | 364 (7.3)   |       |
| Smoked food         |      |            |             | 0.136 |
| Occasional          | 4767 | 125 (90.6) | 4642 (93.7) |       |
| Regular             | 324  | 13 (9.4)   | 311 (6.3)   |       |
| Barbecue food       |      |            |             | 0.192 |
| Occasional          | 4812 | 127 (92)   | 4685 (94.6) |       |
| Regular             | 279  | 11 (8)     | 268 (5.4)   |       |
| Overnight leftovers |      |            |             | 0.119 |
| Occasional          | 3622 | 90 (65.2)  | 3532 (71.3) |       |
| Regular             | 1469 | 48 (34.8)  | 1421 (28.7) |       |
| Red meat §          |      |            |             | 0.061 |
| Occasional          | 2368 | 75 (54.3)  | 2293 (46.3) |       |
| Regular             | 2723 | 63 (45.7)  | 2660 (53.7) |       |
| White meat §        |      |            |             | 0.574 |
| Occasional          | 2869 | 81 (58.7)  | 2788 (56.3) |       |
| Regular             | 2222 | 57 (41.3)  | 2165 (43.7) |       |
| Green vegetables    |      |            |             | 0.097 |
| Occasional          | 1143 | 39 (28.3)  | 1104 (22.3) |       |
| Regular             | 3948 | 99 (71.7)  | 3849 (77.7) |       |
| Fresh fruits        |      |            |             | 0.003 |
| Occasional          | 2428 | 83 (60.1)  | 2345 (47.3) |       |
| Regular             | 2663 | 55 (39.9)  | 2608 (52.7) |       |

Data are presented as n (%) for categorical variables, or mean (SD) for continuous variables. For variables about eating habits, two categories for frequency of consumption were provided, that is, occasional (< 3 times/week) and regular (at least 3 times/week).

\* P values refer to comparison between gastric cancer and non-gastric cancer groups in the univariate analysis.

†For variables not significant ( $P > 0.05$ ) in the logistic regression model, multivariable data are not shown.

\*\*P values refer P values in the logistic regression multivariate analysis.

‡ Body mass index: weight (kg)/height (m)<sup>2</sup>.

§ Red meat includes beef, pork, and lamb. White meat includes fish, chicken, and duck.

CI, confidence interval; EIU, enzyme-immunoassay unit; G-17, gastrin-17; *H. pylori*, *Helicobacter pylori*; OR, odds ratio; PG, pepsinogen; SD, standard deviation.

**Supplementary Table 2** Multivariate analysis of the variables in the prediction model for junctional gastric cancer

| Variable                              | Adjusted OR<br>(95% CI) | <i>P</i> value |
|---------------------------------------|-------------------------|----------------|
| Age (years)                           |                         |                |
| 50-59 vs. 40-49                       | 1.20 (0.86-1.38)        | 0.763          |
| 60-69 vs. 40-49                       | 4.67 (1.88-11.59)       | <0.001         |
| > 69 vs. 40-49                        | 13.64 (5.53-33.64)      | <0.001         |
| Sex (Male vs. Female )                | 2.73 (1.28-5.84)        | <0.001         |
| Fried food (Regular vs. Occasional)   | 2.83 (1.16-6.91)        | 0.022          |
| Fresh Fruits (Regular vs. Occasional) | 0.34 (0.16-0.72)        | 0.005          |

CI, confidence interval; OR, odds ratio;

**Supplementary Table 3** Multivariate analysis of the variables in the prediction model for non-junctional gastric cancer

| Variable                                       | Adjusted OR<br>(95% CI) | P value |
|------------------------------------------------|-------------------------|---------|
| Age (years)                                    |                         |         |
| 50-59 vs. 40-49                                | 2.52 (1.55-4.07)        | <0.001  |
| 60-69 vs. 40-49                                | 3.64 (2.26-5.86)        | <0.001  |
| > 69 vs. 40-49                                 | 6.82 (4.12-11.28)       | <0.001  |
| Sex (Male vs. Female)                          | 2.44 (1.83-3.26)        | <0.001  |
| PG I/II ratio (< 3.89 vs. $\geq$ 3.89)         | 2.19 (1.5-3.19)         | <0.001  |
| Anti- <i>H. pylori</i> (Positive vs. Negative) | 1.33 (1.02-1.74)        | 0.036   |
| G17 (pmol/L)                                   |                         |         |
| 1.50-5.70 vs. $\leq$ 1.49                      | 2.08 (1.34-3.24)        | 0.001   |
| >5.70 vs. $\leq$ 1.49                          | 2.98 (1.96-4.54)        | <0.001  |
| Pickled food (Regular vs. Occasional)          | 1.50 (1.08-2.07)        | 0.015   |
| Fried food (Regular vs. Occasional)            | 1.63 (1.06-2.49)        | 0.026   |

CI, confidence interval; OR, odds ratio;

**Supplementary Table 4** Multivariate analysis of the variables in the prediction model for intestinal gastric cancer

| Variable                               | Adjusted OR<br>(95% CI) | <i>P</i> value |
|----------------------------------------|-------------------------|----------------|
| Age (years)                            |                         |                |
| 50-59 vs. 40-49                        | 2.77 (1.72-4.47)        | <0.001         |
| 60-69 vs. 40-49                        | 4.13 (2.57-6.61)        | <0.001         |
| > 69 vs. 40-49                         | 8.38 (5.13-13.68)       | <0.001         |
| Sex (Male vs. Female )                 | 2.56 (1.95-3.37)        | <0.001         |
| PG I/II ratio (< 3.89 vs. ≥ 3.89)      | 1.98 (1.37-2.87)        | 0.003          |
| Anti-H. pylori (Positive vs. Negative) | 1.28 (1.00-1.64)        | 0.048          |
| G17 (pmol/L)                           |                         |                |
| 1.50-5.70 vs. ≤1.49                    | 2.03 (1.35-3.07)        | <0.001         |
| >5.70 vs. ≤1.49                        | 2.84 (1.92-4.2)         | <0.001         |
| Pickled food (Regular vs. Occasional)  | 1.53 (1.13-2.08)        | 0.006          |
| Fried food (Regular vs. Occasional)    | 1.73 (1.16-2.58)        | 0.007          |

CI, confidence interval; OR, odds ratio;

**Supplementary Table 5** Multivariate analysis of the variables in the prediction model for diffuse gastric cancer

| Variable       | Adjusted OR<br>(95% CI) | <i>P</i> value |
|----------------|-------------------------|----------------|
| Age (years)    |                         |                |
| > 69 vs. 40-49 | 6.99 (1.56-31.26)       | <0.001         |

CI, confidence interval; OR, odds ratio;

**Supplementary Table 6** Risk categories for different gastric diseases

|                               |             | Gastric cancer | Low-grade<br>intraepithelial<br>neoplasia | Atrophic gastritis | Gastric ulcer | Duodenal ulcer | Gastric polyps | Reflux<br>esophagitis |
|-------------------------------|-------------|----------------|-------------------------------------------|--------------------|---------------|----------------|----------------|-----------------------|
|                               |             | 267            | 545                                       | 2395               | 465           | 319            | 1250           | 369                   |
| Derivation cohort<br>(n=9838) | Low risk    | 78 (29.2%)     | 336 (61.7%)                               | 1538 (64.2%)       | 215 (46.2%)   | 205 (64.3%)    | 900 (72.0%)    | 228 (61.8%)           |
|                               | Medium risk | 120 (44.9%)    | 171 (31.4%)                               | 709 (29.6%)        | 186 (40.0%)   | 94 (29.5%)     | 298 (23.8%)    | 123 (33.3%)           |
|                               | High risk   | 69 (25.8%)     | 38 (7.0%)                                 | 148 (6.2%)         | 64 (13.8%)    | 20 (6.3%)      | 52 (4.2%)      | 18 (4.9%)             |
|                               |             | 138            | 281                                       | 1256               | 229           | 151            | 622            | 207                   |
| Validation cohort<br>(n=5091) | Low risk    | 42 (30.4%)     | 155 (55.2%)                               | 784 (62.4%)        | 102 (44.5%)   | 97 (64.2%)     | 446 (71.5%)    | 149 (72.0%)           |
|                               | Medium risk | 65 (47.1%)     | 100 (35.6%)                               | 394 (31.4%)        | 104 (45.4%)   | 45 (29.8%)     | 153 (24.6%)    | 53 (25.6%)            |
|                               | High risk   | 31 (22.5%)     | 26 (9.3%)                                 | 78 (6.2%)          | 23 (10.0%)    | 9 (6.0%)       | 24 (3.9%)      | 5 (2.4%)              |
| Patients                      |             | 405            | 826                                       | 3651               | 694           | 470            | 1872           | 576                   |
| Total(n=14929)                | Low risk    | 120 (29.6%)    | 491 (59.4%)                               | 2322 (63.6%)       | 317 (45.7%)   | 302 (64.2%)    | 1345 (71.8%)   | 377 (65.4%)           |
|                               | Medium risk | 185 (45.7%)    | 271 (32.8%)                               | 1103 (30.2%)       | 290 (41.8%)   | 139 (29.6%)    | 451 (24.1%)    | 176 (30.6%)           |
|                               | High risk   | 100 (24.7%)    | 64 (7.8%)                                 | 226 (6.2%)         | 87 (12.5%)    | 29 (6.2%)      | 76 (4.1%)      | 23 (4.0%)             |

**Supplementary Table 7** Multivariable analyses in the derivation cohort (excluding G-17)

| Variable                               | Adjusted OR<br>(95% CI) | <i>P</i> value |
|----------------------------------------|-------------------------|----------------|
| Age (years)                            |                         |                |
| 50-59 vs. 40-49                        | 2.85 (1.77-4.59)        | < 0.001        |
| 60-69 vs. 40-49                        | 4.43 (2.77-7.08)        | < 0.001        |
| > 69 vs. 40-49                         | 9.40 (5.78-15.28)       | < 0.001        |
| Sex (Male vs. Female )                 | 2.46 (1.88-3.22)        | < 0.001        |
| PG I/II ratio (< 3.89 vs. ≥ 3.89)      | 2.44 (1.71-3.48)        | < 0.001        |
| Anti-H. pylori (Positive vs. Negative) | 1.37 (1.07-1.75)        | 0.014          |
| Pickled food (Regular vs. Occasional)  | 1.48 (1.1-2.01)         | 0.011          |
| Fried food (Regular vs. Occasional)    | 1.70 (1.15-2.53)        | 0.008          |

CI, confidence interval; OR, odds ratio;



**Supplementary Table 8** Performance of the risk prediction models with different sets of variables (with or without G-17)

|                     | Prediction model | Predictors                                                                              | Discrimination, AUC (95% CI) | Calibration, P value | P value   |
|---------------------|------------------|-----------------------------------------------------------------------------------------|------------------------------|----------------------|-----------|
| Models with G-17    | Model 1          | Age, sex, <i>H. pylori</i> infection, PG I/II ratio, G-17, pickled food, and fried food | 0.760 (0.732-0.788)          | 0.605                | Reference |
|                     | Model 2          | Age, sex, <i>H. pylori</i> infection, PG I/II ratio, and G-17                           | 0.752 (0.725-0.780)          | 0.629                | 0.689     |
|                     | Model 3          | Age, <i>H. pylori</i> infection, PG I/II ratio, and G-17                                | 0.724 (0.696-0.753)          | 0.638                | 0.080     |
|                     | Model 4          | Sex, <i>H. pylori</i> infection, PG I/II ratio, and G-17                                | 0.695 (0.666-0.723)          | 0.229                | < 0.001   |
|                     | Model 5          | <i>H. pylori</i> infection, PG I/II ratio, and G-17                                     | 0.647 (0.615-0.678)          | 0.447                | < 0.001   |
|                     | Model 6          | <i>H. pylori</i> infection and PG I/II ratio                                            | 0.569 (0.532-0.606)          | 0.834                | < 0.001   |
|                     | Model 7          | PG I/II ratio and G-17                                                                  | 0.643 (0.611-0.675)          | 0.166                | < 0.001   |
| Models without G-17 | Model 1          | Age, sex, <i>H. pylori</i> infection, PG I/II ratio, pickled food, and fried food       | 0.738 (0.708-0.769)          | 0.860                | Reference |
|                     | Model 2          | Age, sex, <i>H. pylori</i> infection, PG I/II ratio                                     | 0.730 (0.700-0.760)          | 0.867                | 0.089     |
|                     | Model 3          | Age, <i>H. pylori</i> infection, PG I/II ratio                                          | 0.698 (0.668-0.728)          | 0.961                | < 0.001   |
|                     | Model 4          | Sex, <i>H. pylori</i> infection, PG I/II ratio                                          | 0.643 (0.611-0.675)          | 0.900                | < 0.001   |
|                     | Model 5          | <i>H. pylori</i> infection, PG I/II ratio                                               | 0.569 (0.535-0.602)          | 0.834                | < 0.001   |
|                     | Model 6          | PG I/II ratio                                                                           | 0.546 (0.524-0.567)          | No results           | < 0.001   |

Model 1 included a set of variables selected according to statistical criteria. Other models included a subset of variables coming from the Model 1.

AUC, area under the receiver operating characteristic curve; CI, confidence interval; G-17, gastrin-17; *H. pylori*, *Helicobacter pylori*; PG, pepsinogen.

**Supplementary Table 9** Serum G-17 levels in patients with gastric cancer, atrophy, and other gastric diseases

| G-17, pmol/L   | Gastric cancer | Atrophy (n=2395) |                           |                |                |                               | Other gastric     |
|----------------|----------------|------------------|---------------------------|----------------|----------------|-------------------------------|-------------------|
|                | (n=267)        | Total (n=2395)   | Isolated corpus<br>(n=48) | Angulus (n=71) | Antrum (n=579) | Several locations<br>(n=1697) | diseases (n=7176) |
| ≤ 1.49         | 34 (12.7%)     | 684 (28.6%)      | 7 (14.6%)                 | 30 (42.3%)     | 183 (31.6%)    | 464 (27.4%)                   | 2094 (29.2%)      |
| 1.50-5.70      | 83 (31.1%)     | 820 (34.2%)      | 11 (22.9%)                | 24 (33.8%)     | 211 (36.4%)    | 574 (33.8%)                   | 2417 (33.7%)      |
| > 5.70         | 150 (56.2%)    | 891 (37.2%)      | 30 (62.5%)                | 17 (23.9%)     | 185 (32.0%)    | 659 (38.8%)                   | 2665 (37.1%)      |
| Median (range) | 6.889 (99.99)  | 3.528 (355.43)   | 8.55 (149.94)             | 2.01 (38.49)   | 3.13 (164.73)  | 3.6 (355.43)                  | 3.44 (367.06)     |

**Supplementary Table 10** Distribution of histological types of GC in different locations.

|                              |                         | Junctional GC | Non-junctional GC |
|------------------------------|-------------------------|---------------|-------------------|
|                              |                         | 36            | 231               |
| Derivation cohort<br>(n=267) | Intestinal type (n=167) | 33            | 134               |
|                              | Percentage in Row       | 19.8%         | 80.2%             |
|                              | Percentage in Column    | 91.7%         | 58.0%             |
|                              | Diffuse type (n=100)    | 3             | 97                |
|                              | Percentage in Row       | 3%            | 97%               |
|                              | Percentage in Column    | 8.3%          | 42.0%             |
|                              |                         | 9             | 129               |
| Validation cohort<br>(n=138) | Intestinal type (n=93)  | 7             | 86                |
|                              | Percentage in Row       | 7.5%          | 92.5%             |
|                              | Percentage in Column    | 77.8%         | 67.7%             |
|                              | Diffuse type (n=45)     | 2             | 43                |
|                              | Percentage in Row       | 4.4%          | 95.6%             |
|                              | Percentage in Column    | 22.2%         | 33.3%             |
|                              |                         | 45            | 360               |
| Total<br>(n=405)             | Intestinal type (n=260) | 40            | 220               |
|                              | Percentage in Row       | 15.4%         | 84.6%             |
|                              | Percentage in Column    | 88.9%         | 61.1%             |
|                              | Diffuse type (n=145)    | 5             | 140               |
|                              | Percentage in Row       | 3.4%          | 96.6%             |
|                              | Percentage in Column    | 11.1%         | 38.9%             |

**Supplementary Table 11** Risk of gastric cancer risk category between two groups  
in two cohorts

|             | Derivation cohort (n=267) |                                     | Validation cohort (n=138) |                                     |
|-------------|---------------------------|-------------------------------------|---------------------------|-------------------------------------|
|             | GC alone<br>(n=179, %)    | GC with other diseases<br>(n=88, %) | GC alone<br>(n=84, %)     | GC with other diseases<br>(n=54, %) |
| Low risk    | 57 (31.8%)                | 23 (26.1%)                          | 28 (33.3%)                | 14 (25.9%)                          |
| Medium risk | 82 (45.8%)                | 39 (44.3%)                          | 38 (45.2%)                | 27 (50.0%)                          |
| High risk   | 40 (22.3%)                | 26 (29.5%)                          | 18 (21.4%)                | 13 (24.1%)                          |

**Supplementary Figure 1** Distribution of upper gastrointestinal diseases among all participants.
